# Supplementary material
Source: PubMed Central journal article supplement (PMC2821290)
Supplement: supp_08-1753_Online_supplement.pdf [file supp_08-1753_Online_supplement.pdf]

## MATERIAL AND METHODS

During the baseline visit in 1985-86 (year 0), 5,115 black and white men and women were recruited into the CARDIA study. Of these, 3,950 participants were followed up in 1995-96 (year 10); 3,672 in 2000-2001 (year 15) and 3549 in 2005-2006 (year 20). Demographic characteristics, lifestyle habits (e.g., cigarette smoking), physical activity, and medical history were collected by self-report. The diagnosis of asthma was made if the subject was taking asthma medication (usually based on examination of medicine containers) or a self-reported doctor or nurse diagnosis of asthma that had been active in the past year or was “still active” at any of the study visits.

Spirometry at years 5 and 10 was performed using a Collins Survey 8-liter water sealed spirometer and an Eagle II Microprocessor (Warren E. Collins, Inc., Braintree, MA). At year 20, a dry rolling-seal OMI spirometer was used (Viasys Corp, Loma Linda, CA). A comparability study performed on 25 volunteers at the LDS Hospital (Salt Lake City, UT) demonstrated excellent consistency between the old and new machines; the average difference between the Collins Survey and OMI spirometer was 6 ml for FVC and 21 ml for FEV<sub>1</sub>. Standard quality control and testing procedures<sup>1-4</sup> were followed at all examinations.

Overnight fasting blood samples were collected and processed within 90 minutes of blood collection and stored at -70°C. ICAM-1 levels were measured using serum samples diluted 1:400 fold and the ELISA assay was performed according to manufacturer's recommendation (R&D Systems; Cat No DY720). EDTA-plasma P-selectin levels were measured using an ELISA kit and plasma samples diluted 1:5 fold according to the manufacturer's recommendation (R&D systems, Cat No.BBC 6). The limit of sensitivity of the P-selectin and ICAM-1 assays was 125 pg/ml and 15 pg/ml respectively while the coefficient of variation was 9.4% for both assays.

## RESULTS

### **Analysis of lung function and adhesion molecules among smokers and never smokers**

Year 20 FEV<sub>1</sub> and FEV<sub>1</sub>/FVC were significantly higher ( $p \leq 0.01$ ) in never smokers as compared to smokers (current and ever smokers) (FVC: 3900 ml vs. 3858 ml ( $p=0.53$ ); FEV<sub>1</sub>: 3119 ml vs. 3035 ml; FEV<sub>1</sub>/FVC: 79.37% vs. 77.61%). FVC was significantly lower in the highest vs. lowest ICAM-1 quartile in both smokers and never smokers (193 ml in smokers,  $p$  for trend = 0.003 and 163 ml in never smokers,  $p$  for trend = 0.003) (Table 1) as expected given that smoking induces oxidation and inflammation. The difference in FEV<sub>1</sub> from the lowest to highest ICAM-1 quartile in smokers was higher as compared to never smokers (168 ml in smokers ( $p=0.002$ ) vs. 106 ml ( $p=0.02$ ) in never smokers) but this difference was not statistically significant ( $p$  for the ICAM-1 and smoking interaction term  $>0.25$  for both FVC and FEV<sub>1</sub>) (Table 1). FEV<sub>1</sub>/FVC was not associated with ICAM-1 levels in smokers or never smokers (Table 1). There were no significant interactions between ICAM-1 quartiles and smoking status in determining FVC, FEV<sub>1</sub> or FEV<sub>1</sub>/FVC ( $p > 0.70$ ). In addition, P-selectin levels were not associated with lung function in smokers and non smokers and the magnitude of difference in FVC, FEV<sub>1</sub>, and FEV<sub>1</sub>/FVC was similar in both subgroups (Table 1). There were no significant interactions between P-selectin quartiles and smoking status in determining FVC, FEV<sub>1</sub> or FEV<sub>1</sub>/FVC ( $p > 0.71$ ).

### **Analysis of lung function and endothelial markers among participants with and without asthma**

Lung function values (FVC, FEV<sub>1</sub>, and FEV<sub>1</sub>/FVC) were higher ( $p < 0.0001$ ) in participants without asthma as compared to participants with asthma (FVC: 4007 ml vs. 3619 ml;

FEV<sub>1</sub>: 3156 ml vs. 2735 ml; FEV<sub>1</sub>/FVC: 79.18% vs. 76.16%). The difference in FVC from highest to lowest ICAM-1 quartile was significant in both participants without asthma (154 ml, p=0.002) and participants with asthma (225 ml, p=0.05) (Table 2). FEV<sub>1</sub> was also significantly lower in the highest vs. lowest ICAM-1 quartiles among participants without asthma (103 ml, p for trend = 0.001) but was not significantly different among participants with asthma (182 ml, p for trend = 0.11). The greater estimated difference in those with asthma was as expected given that asthma represents an inflammatory state. However, there was no significant interaction between ICAM-1 quartiles and asthma status in determining FVC or FEV<sub>1</sub> (p for interaction > 0.25). Even though FEV<sub>1</sub>/FVC was not significantly associated with ICAM-1 quartiles in either participants with or without asthma, FEV<sub>1</sub>/FVC increased from lowest to highest ICAM-1 quartiles in participants without asthma as compared to a decrease in FEV<sub>1</sub>/FVC across ICAM-1 quartiles among participants with asthma (p for ICAM-1 and asthma interaction = 0.03) indicating a relatively higher loss of FEV<sub>1</sub> as compared to FVC across ICAM-1 quartiles in participants with asthma as compared to those without asthma (Table 2). Since airway inflammation in participants with asthma involves both large and small airways, we hypothesize that the additional large-airway inflammation seen in those with asthma may contribute to the relatively higher FEV<sub>1</sub> loss across ICAM-1 quartiles. FVC, FEV<sub>1</sub> and FEV<sub>1</sub>/FVC were not associated with P-selectin concentrations both in participants with and without asthma.

There were no significant interactions between P-selectin quartiles and asthma status in determining FVC, FEV<sub>1</sub> or FEV<sub>1</sub>/FVC (p>0.13).

Table 1: Year 15 ICAM-1 and P-selectin concentrations and year 20 lung function (absolute values of FVC, FEV<sub>1</sub> and FEV<sub>1</sub>/FVC) among non smokers and ever smokers at year 20.

|                                               | YEAR 15 ICAM-1<br>CONCENTRATIONS |                              | Year 15<br>P-selectin                       | YEAR 15 P-SELECTIN<br>CONCENTRATIONS |                              |
|-----------------------------------------------|----------------------------------|------------------------------|---------------------------------------------|--------------------------------------|------------------------------|
|                                               | NON<br>SMOKERS<br>(n=1523)       | SMOKERS<br>(n = 932)         |                                             | NON<br>SMOKERS<br>(n=1523)           | SMOKERS<br>(n = 932)         |
| Year 15 ICAM-1                                | FVC (ml)                         | FVC (ml)                     | Year 15<br>P-selectin                       | FVC (ml)                             | FVC (ml)                     |
| Quartile 1<br>(≤125.47 ng/ml)                 | 4004                             | 4050                         | Quartile 1<br>(≤ 29.47<br>ng/ml)            | 3992                                 | 3982                         |
| Quartile 2<br>(125.48 ng/ml-<br>145.20 ng/ml) | 3982                             | 3967                         | Quartile 2<br>(29.48 ng/ml-<br>35.60 ng/ml) | 3967                                 | 3925                         |
| Quartile 3<br>(145-21 ng/ml-<br>171.08 ng/ml) | 3940                             | 3918                         | Quartile 3<br>(36.61 ng/ml-<br>42.49 ng/ml) | 3941                                 | 3971                         |
| Quartile 4<br>(≥ 171.09 ng/ml)                | 3841                             | 3856                         | Quartile 4<br>(≥ 42.50<br>ng/ml)            | 3902                                 | 3860                         |
| Q1-Q4                                         | 163 (73-253)                     | 193 (91-296)                 | Q1-Q4                                       | 89 (7-171)                           | 122 (19-224)                 |
|                                               | <b>p for<br/>trend=0.003</b>     | <b>p for<br/>trend=0.003</b> |                                             | <b>p for<br/>trend=0.18</b>          | <b>p for<br/>trend=0.06</b>  |
| Year 15 ICAM                                  | FEV <sub>1</sub> (ml)            | FEV <sub>1</sub> (ml)        | Year 15<br>P-selectin                       | FEV <sub>1</sub> (ml)                | FEV <sub>1</sub> (ml)        |
| Quartile 1<br>(≤125.47 ng/ml)                 | 3139                             | 3135                         | Quartile 1<br>(≤ 29.47<br>ng/ml)            | 3149                                 | 3083                         |
| Quartile 2<br>(125.48 ng/ml-<br>145.20 ng/ml) | 3140                             | 3082                         | Quartile 2<br>(29.48 ng/ml-<br>35.60 ng/ml) | 3145                                 | 3035                         |
| Quartile 3<br>(145-21 ng/ml-<br>171.08 ng/ml) | 3133                             | 3033                         | Quartile 3<br>(36.61 ng/ml-<br>42.49 ng/ml) | 3097                                 | 3069                         |
| Quartile 4<br>(≥ 171.09 ng/ml)                | 3033                             | 2967                         | Quartile 4<br>(≥ 42.50<br>ng/ml)            | 3078                                 | 2980                         |
| Q1-Q4                                         | 106 (31-181)                     | 168 (78-257)                 | Q1-Q4                                       | 71 (3-139)                           | 103 (14-192)                 |
|                                               | <b>p for<br/>trend=0.02</b>      | <b>p for<br/>trend=0.002</b> |                                             | <b>p for<br/>trend=0.29</b>          | <b>p for<br/>trend=0.51</b>  |
| Year 15 ICAM                                  | FEV <sub>1</sub> /FVC<br>(%)     | FEV <sub>1</sub> /FVC<br>(%) | Year 15<br>P-selectin                       | FEV <sub>1</sub> /FVC<br>(%)         | FEV <sub>1</sub> /FVC<br>(%) |
| Quartile 1<br>(≤125.47 ng/ml)                 | 78.92                            | 77.87                        | Quartile 1<br>(≤ 29.47<br>ng/ml)            | 79.25                                | 77.83                        |
| Quartile 2<br>(125.48 ng/ml-<br>145.20 ng/ml) | 79.13                            | 77.98                        | Quartile 2<br>(29.48 ng/ml-<br>35.60 ng/ml) | 79.75                                | 77.83                        |
| Quartile 3<br>(145-21 ng/ml-<br>171.08 ng/ml) | 79.90                            | 77.53                        | Quartile 3<br>(36.61 ng/ml-<br>42.49 ng/ml) | 79.13                                | 77.49                        |

|                                      |                             |                             |                                        |                             |                             |
|--------------------------------------|-----------------------------|-----------------------------|----------------------------------------|-----------------------------|-----------------------------|
| Quartile 4<br>( $\geq 171.09$ ng/ml) | 79.68                       | 77.27                       | Quartile 4<br>( $\geq 42.50$<br>ng/ml) | 79.32                       | 77.30                       |
| Q1-Q4                                | -0.76 (-1.70<br>– 0.18)     | 0.60 (-0.69 –<br>1.89)      | Q1-Q4                                  | -0.08 (-0.93 –<br>0.77)     | 0.53 (-0.75 –<br>1.81)      |
|                                      | <b>p for<br/>trend=0.08</b> | <b>p for<br/>trend=0.42</b> |                                        | <b>p for<br/>trend=0.45</b> | <b>p for<br/>trend=0.80</b> |

Tabulated values are estimates from models adjusting for race, sex, age, amount of physical activity, alcohol intake and BMI, all at year 15, asthma status at year 20, and height, height<sup>2</sup> measured at year 0.

Table 2: Year 15 ICAM-1, P-selectin concentrations and Year 20 lung function (FVC, FEV<sub>1</sub> and FEV<sub>1</sub>/FVC) in participants with and without asthma at year 20

|                                        | YEAR 15 ICAM CONCENTRATIONS |                                         | Year 15 P-selectin                   | YEAR 15 P-SELECTIN CONCENTRATIONS |                                         |
|----------------------------------------|-----------------------------|-----------------------------------------|--------------------------------------|-----------------------------------|-----------------------------------------|
|                                        | NON ASTHMATICS (n= 2043)    | ASTHMATICS (PREVALENT+INCIDENT) (n=393) |                                      | NON ASTHMATICS (n=2043)           | ASTHMATICS (PREVALENT+INCIDENT) (n=393) |
| Year 15 ICAM                           | FVC (ml)                    | FVC (ml)                                | Quartile 1 (≤ 29.47 ng/ml)           | FVC (ml)                          | FVC (ml)                                |
| Quartile 1 (≤125.47 ng/ml)             | 4064                        | 3762                                    | Quartile 2 (29.48 ng/ml-35.60 ng/ml) | 4050                              | 3616                                    |
| Quartile 2 (125.48 ng/ml-145.20 ng/ml) | 4041                        | 3651                                    | Quartile 3 (36.61 ng/ml-42.49 ng/ml) | 4003                              | 3682                                    |
| Quartile 3 (145-21 ng/ml-171.08 ng/ml) | 3997                        | 3566                                    | Quartile 4 (≥ 42.50 ng/ml)           | 4011                              | 3647                                    |
| Quartile 4 (≥ 171.09 ng/ml)            | 3910                        | 3536                                    | Q1-Q4                                | 3957                              | 3505                                    |
| Q1-Q4                                  | 154 (81-228)                | 225 (57-394)                            |                                      | 93 (24-162)                       | 111 (-58 - 280)                         |
|                                        | <b>p for trend=0.0002</b>   | <b>p for trend=0.05</b>                 |                                      | <b>p for trend=0.07</b>           | <b>p for trend=0.18</b>                 |
| Year 15 ICAM                           | FEV <sub>1</sub> (ml)       | FEV <sub>1</sub> (ml)                   | Year 15 P-selectin                   | FEV <sub>1</sub> (ml)             | FEV <sub>1</sub> (ml)                   |
| Quartile 1 (≤125.47 ng/ml)             | 3182                        | 2854                                    | Quartile 1 (≤ 29.47 ng/ml)           | 3189                              | 2743                                    |
| Quartile 2 (125.48 ng/ml-145.20 ng/ml) | 3184                        | 2755                                    | Quartile 2 (29.48 ng/ml-35.60 ng/ml) | 3162                              | 2792                                    |
| Quartile 3 (145-21 ng/ml-171.08 ng/ml) | 3173                        | 2691                                    | Quartile 3 (36.61 ng/ml-42.49 ng/ml) | 3158                              | 2744                                    |
| Quartile 4 (≥ 171.09 ng/ml)            | 3079                        | 2671                                    | Quartile 4 (≥ 42.50 ng/ml)           | 3115                              | 2645                                    |
| Q1-Q4                                  | 103 (42-164)                | 182 (26-339)                            | Q1-Q4                                | 73 (16-130)                       | 98 (-59-254)                            |
|                                        | <b>p for trend=0.001</b>    | <b>p for trend=0.11</b>                 |                                      | <b>p for trend=0.09</b>           | <b>p for trend=0.31</b>                 |
| Year 15 ICAM                           | FEV <sub>1</sub> /FVC (%)   | FEV <sub>1</sub> /FVC (%)               | Year 15 P-selectin                   | FEV <sub>1</sub> /FVC (%)         | FEV <sub>1</sub> /FVC (%)               |
| Quartile 1 (≤125.47 ng/ml)             | 78.75                       | 76.67                                   | Quartile 1 (≤ 29.47 ng/ml)           | 79.06                             | 76.60                                   |
| Quartile 2                             | 79.04                       | 75.99                                   | Quartile 2                           | 79.41                             | 76.67                                   |

|                                               |                             |                             |                                               |                             |                             |
|-----------------------------------------------|-----------------------------|-----------------------------|-----------------------------------------------|-----------------------------|-----------------------------|
| (125.48 ng/ml-<br>145.20 ng/ml)               |                             |                             | (29.48<br>ng/ml-35.60<br>ng/ml)               |                             |                             |
| Quartile 3<br>(145-21 ng/ml-<br>171.08 ng/ml) | 79.68                       | 76.03                       | Quartile 3<br>(36.61<br>ng/ml-42.49<br>ng/ml) | 79.20                       | 75.67                       |
| Quartile 4<br>(≥ 171.09 ng/ml)                | 79.33                       | 76.08                       | Quartile 4<br>(≥ 42.50<br>ng/ml)              | 79.11                       | 75.86                       |
| Q1-Q4                                         | -0.57 (-1.33 –<br>0.18)     | 0.59 (-1.97 –<br>3.15)      | Q1-Q4                                         | -0.04(-0.75 –<br>0.66)      | 0.74 (-1.81 –<br>3.29)      |
|                                               | <b>p for<br/>trend=0.07</b> | <b>p for<br/>trend=0.95</b> |                                               | <b>p for<br/>trend=0.76</b> | <b>p for<br/>trend=0.79</b> |

Tabulated values are estimates from models adjusting for race, sex, age, amount of physical activity, alcohol intake and BMI, all at year 15, smoking status at year 20, and height, height<sup>2</sup> measured at year 0.

**REFERENCES**

- 1 Standardization of Spirometry, 1994 Update. American Thoracic Society. Am J Respir Crit Care Med 1995; 152:1107-1136
- 2 Miller MR, Hankinson J, Brusasco V, et al. Standardisation of spirometry. Eur Respir J 2005; 26:319-338
- 3 Standardization of spirometry--1987 update. Statement of the American Thoracic Society. Am Rev Respir Dis 1987; 136:1285-1298
- 4 ATS statement--Snowbird workshop on standardization of spirometry. Am Rev Respir Dis 1979; 119:831-838
